# Supplementary material for: Highly sensitive and specific screening of EGFR mutation using a PNA microarray-based fluorometric assay based on rolling circle amplification and graphene oxide
Source: Royal Society of Chemistry journal article supplement (doi:10.1039/c9ra06758b), 2019-01-01
Supplement: c9ra06758b1.pdf [file c9ra06758b1.pdf]

## Supporting Information

### Highly Sensitive and Specific Screening of EGFR Mutation Using a PNA Microarray-based Fluorometric Assay based on Rolling Circle Amplification and Graphene Oxide

Xiaojun Xu<sup>#,a,b</sup>, Shu Xing<sup>#,a</sup>, Pan Fu<sup>a,d</sup>, Mengjia Xu<sup>a,d</sup>, Tingting Gao<sup>a</sup>, Xiaokang  
Zhang<sup>a</sup>, Yang Zhao<sup>\*,c</sup> and Chao Zhao<sup>\*,a</sup>

<sup>a</sup> Cixi Institute of Biomedical Engineering, Ningbo Institute of Materials Technology  
and Engineering, Chinese Academy of Sciences, Ningbo 315201, P. R. China

<sup>b</sup> Institute of Pharmaceutical Chemistry, Zhejiang Pharmaceutical College, Ningbo  
315100, P. R. China

<sup>c</sup> College of Science and Technology, Ningbo University, Ningbo 315212, P. R. China

<sup>d</sup> University of Chinese Academy of Sciences, Beijing 100049, P. R. China

<sup>#</sup> Xiaojun Xu and Shu Xing contributed equally to this work.

\*Corresponding author.

E-mail address:

zhaochao@nimte.ac.cn (Chao Zhao), zhaoyang@nbu.edu.cn (Yang Zhao)

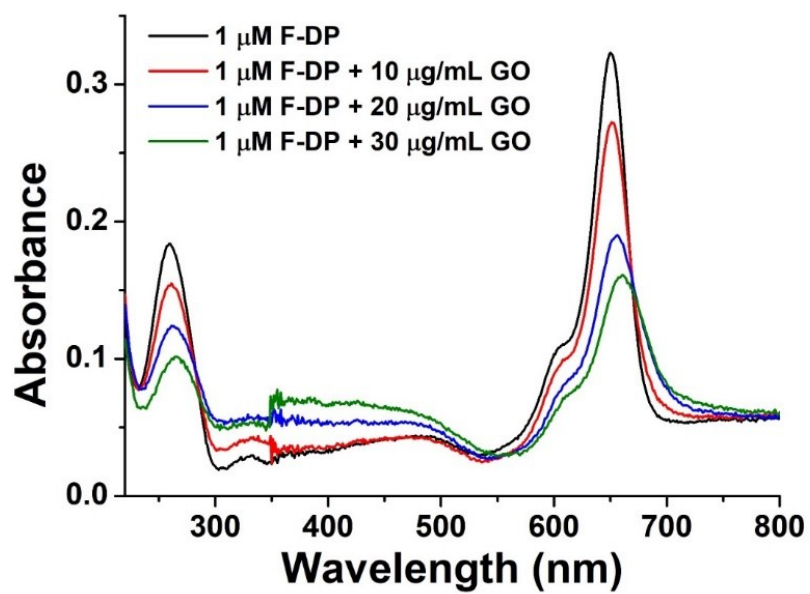

**Fig. S1.** UV/vis absorption spectra of 1 μM F-DP solutions in the absence and presence of different concentrations of GO.
